# Supplementary material for: Coupled molecular design diagrams to guide safer chemical design with reduced likelihood of perturbing the NRF2-ARE antioxidant pathway and inducing cytotoxicity
Source: Royal Society of Chemistry journal article supplement (doi:10.1039/c6gc02073a), 2016-01-01
Supplement: c6gc02073a1.pdf [file c6gc02073a1.pdf]

■ Electronic Supplementary Information (ESI)

# Coupled Molecular Design Diagrams to Guide Safer Chemical Design with Reduced Likelihood of Perturbing the NRF2-ARE Antioxidant Pathway and Inducing Cytotoxicity

Longzhu Q. Shen(1), Fjodor Melnikov(1), John Roethle(3), Aditya Gudibanda(4), Richard S. Judson(2),  
Julie B. Zimmerman(1,5), Paul T. Anastas(1,3\*)

(1) School of Forestry and Environmental Studies, Yale University, New Haven, CT 06511

(2) U.S. EPA, National Center for Computational Toxicology, RTP NC 27711

(3) Department of Chemistry, Yale University, New Haven, CT 06511

(4) Department of Computer Science, Yale University, New Haven, CT 06511

(5) Department of Chemical and Environmental Engineering, Yale University, New Haven, CT 06511

## Contents

|                                                                   | Page S   |
|-------------------------------------------------------------------|----------|
| <b>1 NRF2-ARE Assays Testing Range</b>                            | <b>2</b> |
| <b>2 Activity Comparison between ATG_NRF2 and Tox21_ARE assay</b> | <b>2</b> |
| <b>3 Exploratory Statistics</b>                                   | <b>3</b> |

## 1 NRF2-ARE Assays Testing Range

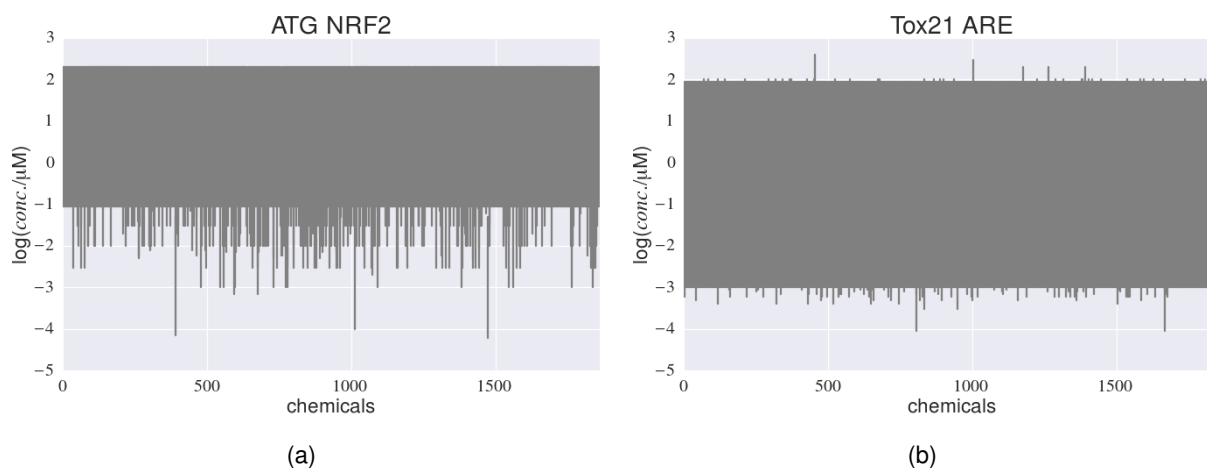

Figure S 1: Concentration range for tested chemicals

## 2 Activity Comparison between ATG\_NRF2 and Tox21\_ARE assay

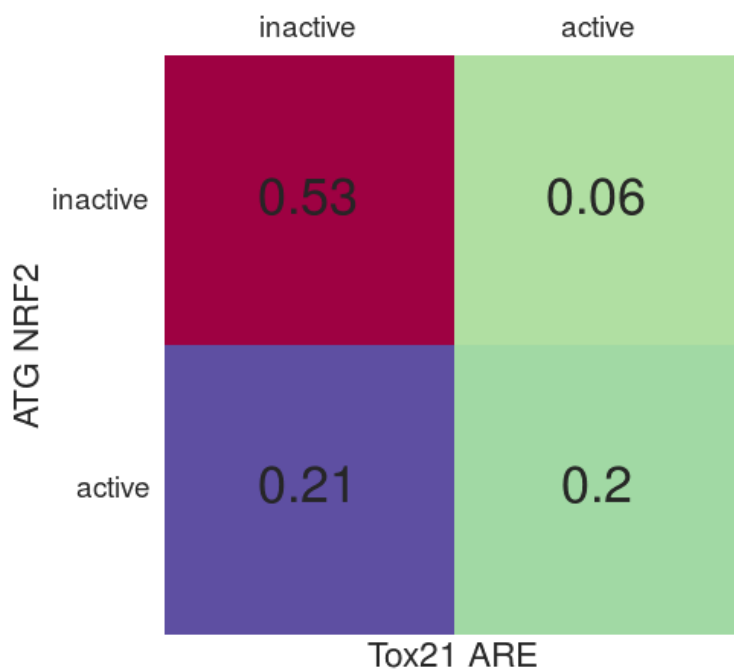

Figure S 2: Confusion matrix for ATG\_NRF2 and Tox21\_ARE activity

Chemicals corresponding to the diagonal elements in the matrix were chosen for this study.

### 3 Exploratory Statistics

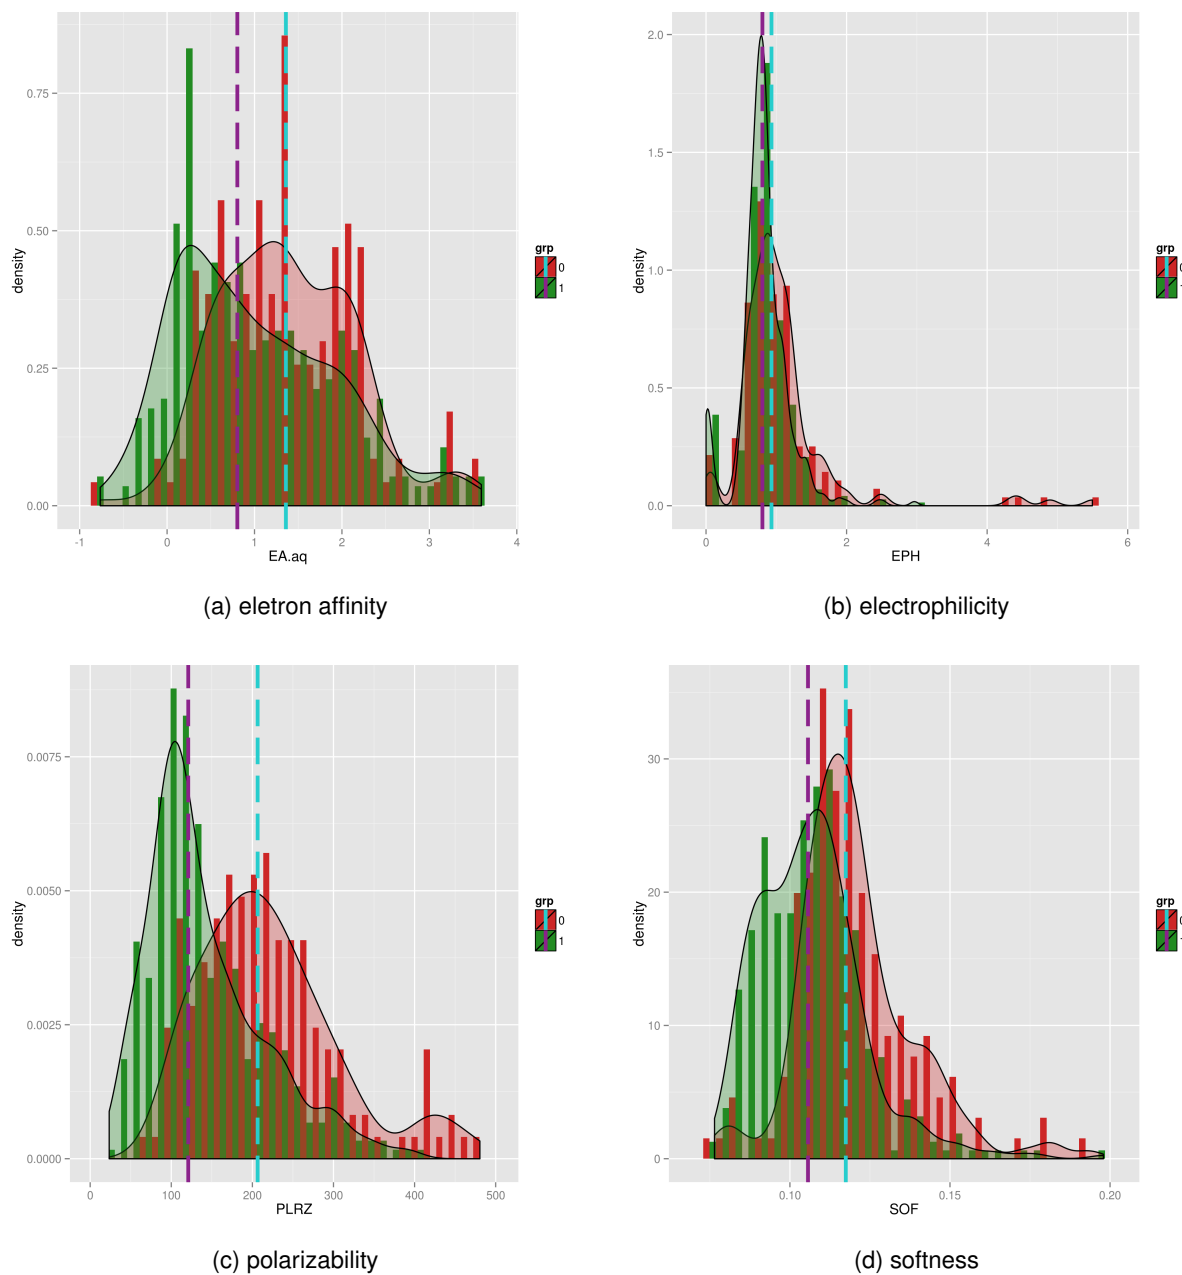

Figure S 3: Histograms for the chemicals by groups. 1 : inactive; 0 : active. Verical dotted line : median for a group distribution. to be continued on the next page

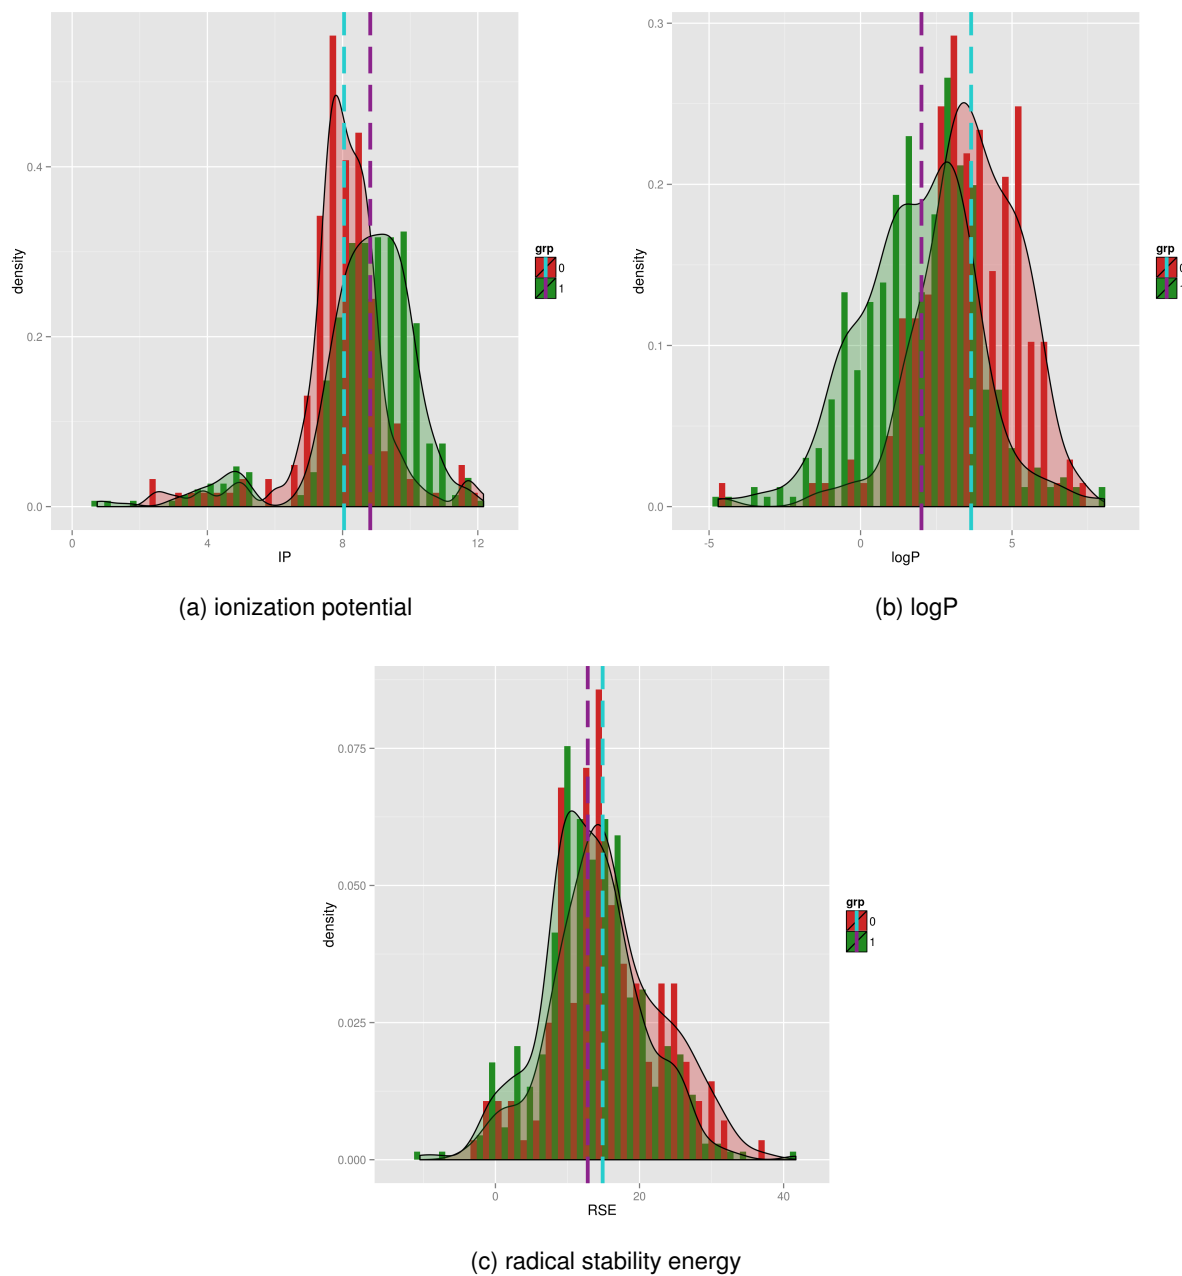

Figure S 3: continued. Histograms for the chemicals by groups.

Table S 1: ROC AUC for design variables

| design variable | ROC AUC | design variable | ROC AUC |
|-----------------|---------|-----------------|---------|
| EA.aq           | 0.65    | PLRZ            | 0.76    |
| EPH             | 0.62    | SOF             | 0.75    |
| IP              | 0.67    | logP            | 0.75    |
| RSE             | 0.58    |                 |         |
